# Supplementary material for: Whole‐brain functional connectivity correlates of obesity phenotypes
Source: PubMed Central journal article supplement — Hum Brain Mapp. 2020 Aug 17;41(17):4912–24. doi: 10.1002/hbm.25167 (PMC7643372; doi:10.1002/hbm.25167), 2020-08-17
Supplement: HBM-41-4912-s001.pdf [file HBM-41-4912-s001.pdf]

| Index |                             | Name                  | FC pattern                     |
|-------|-----------------------------|-----------------------|--------------------------------|
| 1     | SFG, Superior Frontal Gyrus | L                     | A8m, medial area 8             |
| 2     |                             | R                     |                                |
| 3     |                             | L                     | A8dl, dorsolateral area 8      |
| 4     |                             | R                     |                                |
| 5     |                             | L                     | A9l, lateral area 9            |
| 6     |                             | R                     |                                |
| 7     |                             | L                     | A6dl, dorsolateral area 6      |
| 8     |                             | R                     |                                |
| 9     |                             | L                     | A6m, medial area 6             |
| 10    |                             | R                     |                                |
| 11    |                             | L                     | A9m,medial area 9              |
| 12    |                             | R                     |                                |
| 13    |                             | L                     | A10m, medial area 10           |
| 14    |                             | R                     |                                |
| 15    | MFG, Middle Frontal Gyrus   | L                     | A9/46d, dorsal area 9/46       |
| 16    |                             | R                     |                                |
| 17    |                             | L                     | IFJ, inferior frontal junction |
| 18    |                             | R                     |                                |
| 19    |                             | L                     | A46, area 46                   |
| 20    |                             | R                     |                                |
| 21    |                             | L                     | A9/46v, ventral area 9/46      |
| 22    |                             | R                     |                                |
| 23    |                             | L                     | A8vl, ventrolateral area 8     |
| 24    |                             | R                     |                                |
| 25    |                             | L                     | A6vl, ventrolateral area 6     |
| 26    |                             | R                     |                                |
| 27    |                             | L                     | A10l, lateral area10           |
| 28    |                             | R                     |                                |
| 29    | IFG, Inferior Frontal Gyrus | L                     | A44d,dorsal area 44            |
| 30    |                             | R                     |                                |
| 31    |                             | L                     | IFS, inferior frontal sulcus   |
| 32    |                             | R                     |                                |
| 33    |                             | L                     | A45c, caudal area 45           |
| 34    |                             | R                     |                                |
| 35    |                             | L                     | A45r, rostral area 45          |
| 36    |                             | R                     |                                |
| 37    |                             | L                     | A44op, opercular area 44       |
| 38    |                             | R                     |                                |
| 39    |                             | L                     | A44v, ventral area 44          |
| 40    |                             | R                     |                                |
| 41    |                             | L                     | A14m, medial area 14           |
| 42    |                             | R                     |                                |
| 43    | L                           | A12/47o, orbital area | 0.0000                         |

|    |                              |                                    |                                         |                                    |         |
|----|------------------------------|------------------------------------|-----------------------------------------|------------------------------------|---------|
| 44 |                              | R                                  | 12/47                                   | 0.0000                             |         |
| 45 |                              | L                                  | A11l, lateral area 11                   | 0.0000                             |         |
| 46 | OrG, Orbital Gyrus           | R                                  |                                         | 3.4566                             |         |
| 47 |                              | L                                  | A11m, medial area 11                    | 1.7499                             |         |
| 48 |                              | R                                  |                                         | 1.8211                             |         |
| 49 |                              | L                                  | A13, area 13                            | -1.7654                            |         |
| 50 |                              | R                                  |                                         | 0.0000                             |         |
| 51 |                              | L                                  | A12/47l, lateral area                   | -2.0734                            |         |
| 52 |                              | R                                  | 12/47                                   | 5.1050                             |         |
| 53 |                              | PrG, Precentral Gyrus              | L                                       | A4hf, area 4(head and face region) | -0.4790 |
| 54 |                              |                                    | R                                       |                                    | 0.0000  |
| 55 |                              |                                    | L                                       | A6cdl, caudal dorsolateral area 6  | 0.0000  |
| 56 | R                            |                                    | -0.4335                                 |                                    |         |
| 57 | L                            |                                    | A4ul, area 4(upper limb region)         | -4.8043                            |         |
| 58 | R                            |                                    |                                         | 0.0000                             |         |
| 59 | L                            |                                    | A4t, area 4(trunk region)               | -0.5773                            |         |
| 60 | R                            |                                    |                                         | -1.1170                            |         |
| 61 | L                            |                                    | A4tl, area 4(tongue and larynx region)  | -6.9545                            |         |
| 62 | R                            |                                    |                                         | -0.9647                            |         |
| 63 | L                            | A6cvl, caudal ventrolateral area 6 | 2.2413                                  |                                    |         |
| 64 | R                            |                                    | 0.0000                                  |                                    |         |
| 65 | PCL, Paracentral Lobule      | L                                  | A1/2/3ll, area1/2/3 (lower limb region) | -1.7489                            |         |
| 66 |                              | R                                  |                                         | 0.0000                             |         |
| 67 |                              | L                                  | A4ll, area 4, (lower limb region)       | 0.0000                             |         |
| 68 | R                            | 0.0000                             |                                         |                                    |         |
| 69 | STG, Superior Temporal Gyrus | L                                  | A38m, medial area 38                    | 0.0000                             |         |
| 70 |                              | R                                  |                                         | 0.0000                             |         |
| 71 |                              | L                                  | A41/42, area 41/42                      | 0.0000                             |         |
| 72 |                              | R                                  |                                         | 0.8055                             |         |
| 73 |                              | L                                  | TE1.0 and TE1.2                         | -1.4168                            |         |
| 74 |                              | R                                  |                                         | 0.1373                             |         |
| 75 |                              | L                                  | A22c, caudal area 22                    | 4.4506                             |         |
| 76 |                              | R                                  |                                         | 0.0000                             |         |
| 77 |                              | L                                  | A38l, lateral area 38                   | -0.9545                            |         |
| 78 |                              | R                                  |                                         | 5.4097                             |         |
| 79 | L                            | A22r, rostral area 22              | -3.8966                                 |                                    |         |
| 80 | R                            |                                    | 0.0000                                  |                                    |         |
| 81 | MTG, Middle Temporal Gyrus   | L                                  | A21c, caudal area 21                    | 0.0000                             |         |
| 82 |                              | R                                  |                                         | -0.9994                            |         |
| 83 |                              | L                                  | A21r, rostral area 21                   | 0.0000                             |         |
| 84 |                              | R                                  |                                         | 0.0000                             |         |
| 85 |                              | L                                  | A37dl, dorsolateral area37              | 1.5176                             |         |
| 86 |                              | R                                  |                                         | 2.1729                             |         |

|     |                                                |                                |                                                                   |         |
|-----|------------------------------------------------|--------------------------------|-------------------------------------------------------------------|---------|
| 87  |                                                | L                              | aSTS, anterior superior                                           | 0.0000  |
| 88  |                                                | R                              | temporal sulcus                                                   | 0.0000  |
| 89  | ITG, Inferior<br>Temporal Gyrus                | L                              | A20iv, intermediate                                               | 0.0000  |
| 90  |                                                | R                              | ventral area 20                                                   | 2.2925  |
| 91  |                                                | L                              | A37elv, extreme                                                   | 0.0000  |
| 92  |                                                | R                              | lateroventral area37                                              | -3.4704 |
| 93  |                                                | L                              | A20r, rostral area 20                                             | -3.1621 |
| 94  |                                                | R                              |                                                                   | 0.0000  |
| 95  |                                                | L                              | A20il, intermediate lateral<br>area 20                            | 0.0000  |
| 96  |                                                | R                              |                                                                   | 0.0000  |
| 97  |                                                | L                              | A37vl, ventrolateral area<br>37                                   | 0.0000  |
| 98  |                                                | R                              |                                                                   | 0.0000  |
| 99  |                                                | L                              | A20cl, caudolateral of<br>area 20                                 | 0.0000  |
| 100 |                                                | R                              |                                                                   | -4.9056 |
| 101 |                                                | L                              | A20cv, caudoventral of<br>area 20                                 | -0.6570 |
| 102 |                                                | R                              |                                                                   | -4.3997 |
| 103 | FuG, Fusiform<br>Gyrus                         | L                              | A20rv, rostroventral area<br>20                                   | -8.1362 |
| 104 |                                                | R                              |                                                                   | -6.5947 |
| 105 |                                                | L                              | A37mv, medioventral<br>area37                                     | 0.0000  |
| 106 |                                                | R                              |                                                                   | -1.7890 |
| 107 | L                                              | A37lv, lateroventral<br>area37 | 0.0000                                                            |         |
| 108 | R                                              |                                | -1.1177                                                           |         |
| 109 | PhG,<br>Parahippocampal<br>Gyrus               | L                              | A35/36r, rostral area<br>35/36                                    | 0.0000  |
| 110 |                                                | R                              |                                                                   | 0.0000  |
| 111 |                                                | L                              | A35/36c, caudal area<br>35/36                                     | 0.0000  |
| 112 |                                                | R                              |                                                                   | -0.8667 |
| 113 |                                                | L                              | TL, area TL (lateral<br>PPHC, posterior<br>parahippocampal gyrus) | 1.0807  |
| 114 |                                                | R                              |                                                                   | 0.0000  |
| 115 |                                                | L                              | A28/34, area 28/34 (EC,<br>entorhinal cortex)                     | 0.0000  |
| 116 |                                                | R                              |                                                                   | 0.0000  |
| 117 |                                                | L                              | TI, area TI(temporal<br>agranular insular cortex)                 | 0.0000  |
| 118 |                                                | R                              |                                                                   | -4.1507 |
| 119 |                                                | L                              | TH, area TH (medial<br>PPHC)                                      | -3.2024 |
| 120 |                                                | R                              |                                                                   | 0.0000  |
| 121 | pSTS, posterior<br>Superior Temporal<br>Sulcus | L                              | rpSTS, rostoposterior<br>superior temporal sulcus                 | 0.0000  |
| 122 |                                                | R                              |                                                                   | 0.0000  |
| 123 |                                                | L                              | cpSTS, caudoposterior<br>superior temporal sulcus                 | -5.4533 |
| 124 |                                                | R                              |                                                                   | 0.0000  |
| 125 | SPL, Superior                                  | L                              | A7r, rostral area 7                                               | 4.6683  |
| 126 |                                                | R                              |                                                                   | 0.0000  |
| 127 |                                                | L                              | A7c, caudal area 7                                                | -1.8953 |
| 128 |                                                | R                              |                                                                   | 0.0000  |
| 129 |                                                | L                              | A5l, lateral area 5                                               | 7.3437  |

|     |                               |                           |                                                   |                                                          |        |
|-----|-------------------------------|---------------------------|---------------------------------------------------|----------------------------------------------------------|--------|
| 130 | Parietal Lobule               | R                         | A7l, lateral area 7                               | 1.5481                                                   |        |
| 131 |                               | L                         | A7pc, postcentral area 7                          | 0.0000                                                   |        |
| 132 |                               | R                         |                                                   | 0.0000                                                   |        |
| 133 |                               | L                         | A7ip, intraparietal area                          | 1.8218                                                   |        |
| 134 |                               | R                         | 7(hIP3)                                           | 0.0000                                                   |        |
| 135 | IPL, Inferior Parietal Lobule | L                         | A39c, caudal area                                 | 0.0000                                                   |        |
| 136 |                               | R                         | 39(PGp)                                           | 1.6013                                                   |        |
| 137 |                               | L                         | A39rd, rostr dors al area                         | 0.0000                                                   |        |
| 138 |                               | R                         | 39(Hip3)                                          | 0.6183                                                   |        |
| 139 |                               | L                         | A40rd, rostr dors al area                         | 0.1432                                                   |        |
| 140 |                               | R                         | 40(PFt)                                           | 0.0000                                                   |        |
| 141 |                               | L                         | A40c, caudal area                                 | 1.1286                                                   |        |
| 142 |                               | R                         | 40(PFm)                                           | 1.3965                                                   |        |
| 143 |                               | L                         | A39rv, rostroventral area                         | -2.1145                                                  |        |
| 144 |                               | R                         | 39(PGa)                                           | 0.6840                                                   |        |
| 145 | L                             | A40rv, rostroventral area | 2.1221                                            |                                                          |        |
| 146 | R                             | 40(PFop)                  | 0.0000                                            |                                                          |        |
| 147 | Pcun, Precuneus               | L                         | A7m, medial area 7(PEp)                           | 0.0000                                                   |        |
| 148 |                               | R                         |                                                   | 0.0000                                                   |        |
| 149 |                               | L                         | A5m, medial area 5(PEm)                           | -0.5436                                                  |        |
| 150 |                               | R                         |                                                   | 0.0000                                                   |        |
| 151 |                               | L                         | dmPOS, dorsomedial parietooccipital sulcus(PEr)   | 0.0000                                                   |        |
| 152 |                               | R                         |                                                   | 0.0000                                                   |        |
| 153 |                               | L                         | A31, area 31 (Lc1)                                | -3.2748                                                  |        |
| 154 |                               | R                         |                                                   | 0.0000                                                   |        |
| 155 |                               | PoG, Postcentral Gyrus    | L                                                 | A1/2/3ulht, area 1/2/3(upper limb, head and face region) | 0.0000 |
| 156 |                               |                           | R                                                 |                                                          | 0.5571 |
| 157 | L                             |                           | A1/2/3tonla, area 1/2/3(tongue and larynx region) | -0.4452                                                  |        |
| 158 | R                             |                           |                                                   | 0.0000                                                   |        |
| 159 | L                             |                           | A2, area 2                                        | -1.3166                                                  |        |
| 160 | R                             |                           |                                                   | 0.0000                                                   |        |
| 161 | L                             |                           | A1/2/3tru, area1/2/3(trunk region)                | -2.3039                                                  |        |
| 162 | R                             |                           |                                                   | 0.0000                                                   |        |
| 163 | INS, Insular Gyrus            | L                         | G, hypergranular insula                           | 0.0000                                                   |        |
| 164 |                               | R                         |                                                   | 0.0000                                                   |        |
| 165 |                               | L                         | vlA, ventral agranular insula                     | 0.0000                                                   |        |
| 166 |                               | R                         |                                                   | 3.0858                                                   |        |
| 167 |                               | L                         | dIA, dorsal agranular insula                      | 0.0000                                                   |        |
| 168 |                               | R                         |                                                   | 0.0000                                                   |        |
| 169 |                               | L                         | vid/vlg, ventral dysgranular and granular insula  | 0.0000                                                   |        |
| 170 |                               | R                         |                                                   | 0.0000                                                   |        |
| 171 |                               | L                         | dIg, dorsal granular insula                       | 0.0000                                                   |        |
| 172 |                               | R                         |                                                   | 0.0000                                                   |        |

|     |                                            |        |                                             |         |
|-----|--------------------------------------------|--------|---------------------------------------------|---------|
| 173 |                                            | L      | dId, dorsal dysgranular                     | 0.0000  |
| 174 |                                            | R      | insula                                      | 0.0000  |
| 175 | CG, Cingulate Gyrus                        | L      | A23d, dorsal area 23                        | -0.0332 |
| 176 |                                            | R      |                                             | 0.0000  |
| 177 |                                            | L      | A24rv, rostroventral area 24                | 0.0000  |
| 178 |                                            | R      |                                             | 0.0000  |
| 179 |                                            | L      | A32p, pregenual area 32                     | 0.0000  |
| 180 |                                            | R      |                                             | 0.0000  |
| 181 |                                            | L      | A23v, ventral area 23                       | -0.2777 |
| 182 |                                            | R      |                                             | 0.0000  |
| 183 |                                            | L      | A24cd, caudodorsal area 24                  | 0.0000  |
| 184 |                                            | R      |                                             | 0.0000  |
| 185 |                                            | L      | A23c, caudal area 23                        | 0.0000  |
| 186 |                                            | R      |                                             | 0.2450  |
| 187 |                                            | L      | A32sg, subgenual area 32                    | 4.6608  |
| 188 |                                            | R      |                                             | 0.0000  |
| 189 | MVOcC,<br>MedioVentral<br>Occipital Cortex | L      | cLinG, caudal lingual gyrus                 | 0.0000  |
| 190 |                                            | R      |                                             | 0.0000  |
| 191 |                                            | L      | rCunG, rostral cuneus gyrus                 | 0.0000  |
| 192 |                                            | R      |                                             | -1.2024 |
| 193 |                                            | L      | cCunG, caudal cuneus gyrus                  | 0.1512  |
| 194 |                                            | R      |                                             | 0.0000  |
| 195 |                                            | L      | rLinG, rostral lingual gyrus                | 0.0000  |
| 196 |                                            | R      |                                             | 6.9793  |
| 197 |                                            | L      | vmPOS, ventromedial parietooccipital sulcus | -0.1043 |
| 198 |                                            | R      |                                             | -0.6956 |
| 199 | LOcC, lateral<br>Occipital Cortex          | L      | mOccG, middle occipital gyrus               | -1.2656 |
| 200 |                                            | R      |                                             | 0.3217  |
| 201 |                                            | L      | V5/MT+, area V5/MT+                         | 0.4016  |
| 202 |                                            | R      |                                             | 0.0000  |
| 203 |                                            | L      | OPC, occipital polar cortex                 | 1.8874  |
| 204 |                                            | R      |                                             | 0.0000  |
| 205 |                                            | L      | iOccG, inferior occipital gyrus             | 0.0000  |
| 206 |                                            | R      |                                             | 1.2496  |
| 207 |                                            | L      | msOccG, medial superior occipital gyrus     | 0.0000  |
| 208 |                                            | R      |                                             | -1.4231 |
| 209 |                                            | L      | lsOccG, lateral superior occipital gyrus    | -0.3214 |
| 210 | R                                          | 0.0000 |                                             |         |
| 211 | Amyg, Amygdala                             | L      | mAmyg, medial amygdala                      | 0.0000  |
| 212 |                                            | R      |                                             | 0.0000  |
| 213 |                                            | L      | lAmyg, lateral amygdala                     | 0.0000  |
| 214 |                                            | R      |                                             | -0.3843 |
| 215 |                                            | L      | rHipp, rostral                              | 0.0000  |

|     |                   |               |                                      |                                     |         |
|-----|-------------------|---------------|--------------------------------------|-------------------------------------|---------|
| 216 | Hipp, Hippocampus | R             | hippocampus                          | -1.7340                             |         |
| 217 |                   | L             | cHipp, caudal                        | 0.0000                              |         |
| 218 |                   | R             | hippocampus                          | 0.0000                              |         |
| 219 | BG, Basal Ganglia | L             | vCa, ventral caudate                 | -0.1278                             |         |
| 220 |                   | R             |                                      | 0.0000                              |         |
| 221 |                   | L             | GP, globus pallidus                  | 6.2272                              |         |
| 222 |                   | R             |                                      | 0.0000                              |         |
| 223 |                   | L             | NAC, nucleus accumbens               | 3.4768                              |         |
| 224 |                   | R             |                                      | 0.0000                              |         |
| 225 |                   | L             | vmPu, ventromedial putamen           | 0.0000                              |         |
| 226 |                   | R             |                                      | -1.1658                             |         |
| 227 |                   | L             | dCa, dorsal caudate                  | 0.0000                              |         |
| 228 |                   | R             |                                      | -2.1013                             |         |
| 229 |                   | L             | dIPu, dorsolateral putamen           | 0.0000                              |         |
| 230 |                   | R             |                                      | 0.0000                              |         |
| 231 |                   | Tha, Thalamus | L                                    | mPFtha, medial pre-frontal thalamus | 1.0806  |
| 232 |                   |               | R                                    |                                     | -0.2768 |
| 233 | L                 |               | mPMtha, pre-motor thalamus           | 0.0000                              |         |
| 234 | R                 |               |                                      | 0.0000                              |         |
| 235 | L                 |               | Stha, sensory thalamus               | 0.0000                              |         |
| 236 | R                 |               |                                      | -4.6171                             |         |
| 237 | L                 |               | rTtha, rostral temporal thalamus     | -5.4246                             |         |
| 238 | R                 |               |                                      | 0.0000                              |         |
| 239 | L                 |               | PPtha, posterior parietal thalamus   | 0.0000                              |         |
| 240 | R                 |               |                                      | 0.0000                              |         |
| 241 | L                 |               | Otha, occipital thalamus             | 0.0000                              |         |
| 242 | R                 |               |                                      | 0.0000                              |         |
| 243 | L                 |               | cTtha, caudal temporal thalamus      | -2.3300                             |         |
| 244 | R                 |               |                                      | 0.0728                              |         |
| 245 | L                 |               | IPFtha, lateral pre-frontal thalamus | 0.0000                              |         |
| 246 | R                 |               |                                      | -0.0772                             |         |
